# Supplementary material for: Impact of chronic health conditions and injury on school performance and health outcomes in New South Wales, Australia: a retrospective record linkage study protocol
Source: PubMed Central journal article supplement — BMJ Paediatr Open. 2019 Sep 3;3(1):e000530. doi: 10.1136/bmjpo-2019-000530 (PMC6733328; doi:10.1136/bmjpo-2019-000530), 2019-09-03
Supplement: bmjpo-2019-000530.draft_revisions.pdf [file bmjpo-2019-000530.draft_revisions.pdf]

# BMJ Paediatrics Open

BMJ Paediatrics Open is committed to open peer review. As part of this commitment we make the peer review history of every article we publish publicly available.

When an article is published we post the peer reviewers' comments and the authors' responses online. We also post the versions of the paper that were used during peer review. These are the versions that the peer review comments apply to.

The versions of the paper that follow are the versions that were submitted during the peer review process. They are not the versions of record or the final published versions. They should not be cited or distributed as the published version of this manuscript.

BMJ Paediatrics Open is an open access journal and the full, final, typeset and author-corrected version of record of the manuscript is available on our site with no access controls, subscription charges or pay-per-view fees (<http://bmjpaedsopen.bmj.com>).

If you have any questions on BMJ Paediatrics Open's open peer review process please email [info.bmjpo@bmj.com](mailto:info.bmjpo@bmj.com)

# BMJ Paediatrics Open

## Impact of chronic health conditions and injury on school performance and health outcomes in New South Wales, Australia: a record linkage study protocol

|                               |                                                                                                                                                                                                                                                                                                                                                                                                                                                                                                                                                                                                                                                                                                                                                                                                                                 |
|-------------------------------|---------------------------------------------------------------------------------------------------------------------------------------------------------------------------------------------------------------------------------------------------------------------------------------------------------------------------------------------------------------------------------------------------------------------------------------------------------------------------------------------------------------------------------------------------------------------------------------------------------------------------------------------------------------------------------------------------------------------------------------------------------------------------------------------------------------------------------|
| Journal:                      | <i>BMJ Paediatrics Open</i>                                                                                                                                                                                                                                                                                                                                                                                                                                                                                                                                                                                                                                                                                                                                                                                                     |
| Manuscript ID                 | bmjpo-2019-000530                                                                                                                                                                                                                                                                                                                                                                                                                                                                                                                                                                                                                                                                                                                                                                                                               |
| Article Type:                 | Protocol                                                                                                                                                                                                                                                                                                                                                                                                                                                                                                                                                                                                                                                                                                                                                                                                                        |
| Date Submitted by the Author: | 28-May-2019                                                                                                                                                                                                                                                                                                                                                                                                                                                                                                                                                                                                                                                                                                                                                                                                                     |
| Complete List of Authors:     | <p>Mitchell, Rebecca; Australian Institute of Health Innovation, Cameron, Cate; Royal Brisbane and Women's Hospital, Jamieson Trauma Institute; Queensland University of Technology, School of Public Health and Social Work</p> <p>Lystad, Reidar; Australian Institute of Health Innovation</p> <p>Nielssen, Olav; Macquarie University, Faculty of Medicine and Health Sciences</p> <p>McMaugh, Anne; Macquarie University, Department of Educational Studies, Faculty of Human Sciences</p> <p>Herkes, Geoffrey; The University of Sydney School of Medicine; Royal North Shore Hospital</p> <p>Schniering, Carolyn; Macquarie University, Department of Psychology</p> <p>Hng, Tien-Ming; Blacktown and Mount Druitt Hospital, Department of Diabetes and Endocrinology; Western Sydney University, School of Medicine</p> |
| Keywords:                     | Epidemiology, Outcomes research, Adolescent Health                                                                                                                                                                                                                                                                                                                                                                                                                                                                                                                                                                                                                                                                                                                                                                              |
|                               |                                                                                                                                                                                                                                                                                                                                                                                                                                                                                                                                                                                                                                                                                                                                                                                                                                 |

SCHOLARONE™  
Manuscripts

1  
2  
3 **Impact of chronic health conditions and injury on school performance and health**  
4 **outcomes in New South Wales, Australia: a record linkage study protocol**  
5  
6  
7

8 Rebecca J Mitchell<sup>1</sup>, Cate M Cameron<sup>2,3</sup>, Reidar P Lystad<sup>1</sup>, Olav Nielssen<sup>4</sup>, Anne McMaugh<sup>5</sup>,  
9 Geoffrey Herkes<sup>6,7</sup>, Carolyn Schniering<sup>8</sup>, Tien-Ming Hng<sup>9,10</sup>  
10  
11

12  
13 <sup>1</sup>Australian Institute of Health Innovation, Faculty of Medicine and Health Sciences,  
14 Macquarie University, Sydney, Australia.  
15

16  
17 <sup>2</sup>Jamieson Trauma Institute, Royal Brisbane & Women's Hospital, Metro North Hospital and  
18 Health Services District, Brisbane, Australia.  
19

20  
21 <sup>3</sup>School of Public Health and Social Work, Queensland University of Technology, Brisbane,  
22 Australia.  
23

24  
25 <sup>4</sup> Faculty of Medicine and Health Sciences, Macquarie University, Sydney, Australia.  
26

27  
28 <sup>5</sup> Department of Educational Studies, Faculty of Human Sciences, Macquarie University,  
29 Sydney, Australia.  
30

31  
32 <sup>6</sup> University of Sydney, Sydney, Australia.  
33

34  
35 <sup>7</sup> Royal North Shore Hospital, Sydney, Australia.  
36

37  
38 <sup>8</sup> Department of Psychology, Macquarie University, Sydney, Australia.  
39

40  
41 <sup>9</sup> Department of Diabetes and Endocrinology, Blacktown-Mt Druitt Hospital, Sydney,  
42 Australia.  
43

44  
45 <sup>10</sup> School of Medicine, Western Sydney University, Sydney, Australia.  
46  
47  
48

49 **Corresponding author:** Rebecca Mitchell (r.mitchell@mq.edu.au)

50  
51 Australian Institute of Health Innovation, Macquarie University, Level 6, 75 Talavera Road,  
52 Macquarie University NSW 2109, Australia  
53

54  
55 Tel: +61 2 9850 2321 Fax: +61 2 9850 2499  
56  
57  
58  
59  
60

1  
2  
3 **Impact of chronic health conditions and injury on school performance and health**  
4 **outcomes in New South Wales, Australia: a record linkage study protocol**  
5  
6  
7

8 **Abstract**  
9

10 **Introduction:** Children who have sustained a serious injury or who have a chronic health  
11 condition, such as diabetes or epilepsy, may have their school performance adversely  
12 impacted by the condition, treatment of the condition and/or time away from school.  
13 Examining the potential adverse impact requires the identification of children most likely to  
14 be affected and the use of objective measures of education performance. This may  
15 highlight educational disparities that could be addressed with learning support. This study  
16 aims to examine education performance, school completion and health outcomes of  
17 children in New South Wales, Australia who were hospitalised with an injury or a chronic  
18 health condition compared to children who have not been hospitalised for these conditions.  
19

20 **Method and analysis:** This research will be a retrospective population-level case-  
21 comparison study of hospitalised injured or chronically ill children (i.e. diabetes, epilepsy,  
22 asthma, or mental health conditions) aged  $\leq 18$  years in New South Wales (NSW) Australia  
23 using linked health and education administrative data collections. It will examine the  
24 education performance, school completion and health outcomes of children who have been  
25 hospitalised in NSW with an injury or a chronic health condition compared to children  
26 randomly drawn from the NSW population (matched on gender, age and residential  
27 postcode) who have not been hospitalised for these conditions.  
28

29 **Ethics and dissemination:** The study received ethics approval from the NSW Population  
30 Health Services Research Ethics Committee (2018HRE0904). Findings from the research will  
31 be published in peer-reviewed journals and presented at scientific conferences.  
32  
33  
34  
35  
36  
37  
38  
39  
40  
41  
42  
43  
44  
45  
46  
47  
48  
49  
50  
51  
52  
53  
54  
55  
56  
57  
58  
59  
60

**What is known on this subject**

- Poor health can have a negative impact on a child's ability to learn.
- Determining the impact of poor health on learning requires objective measures of education performance.
- There is limited information available regarding a child's ongoing healthcare use while they attend school.

**What this study adds**

- A population-level study to examine the impact of injury or chronic disease on children's scholastic performance.
- This study will identify the types of injuries and chronic illness associated with problems with learning at school.
- The developmental timing and need for educational support will be highlighted for chronically ill children accounting for age, gender and illness type.

## Introduction

Participation in school-based education is important for a child's mental, social and physical development. Any restrictions on the ability of a child to perform to the best of their ability at school may adversely affect their career prospects and long-term quality of life.

Traumatic injury or the presence of a chronic health condition, such as diabetes, epilepsy, asthma, or mental health conditions can have an adverse impact on the child's performance at school<sup>1-8</sup>. Interruptions to education can have a cumulative effect, resulting in being less likely to complete school or attend university and potentially limiting future employment opportunities<sup>9</sup>. Therefore, early identification and recognition of a child's need for learning support at school is critical.

Traumatic injury is the leading cause of hospitalisation among children in Australia, with almost 70,000 children aged  $\leq 16$  years hospitalised each year<sup>10</sup>. Different types of injuries (e.g. burns, traumatic brain injury, orthopaedic injury) and the mechanism of injury (e.g. vehicle crash, pedal cycle collision, falls, self-harm) can affect children in different ways. The more serious the injury, often the more adverse impact on the child's psychological and physical health, and on the child's family<sup>11</sup>. Chronic health conditions can also have an adverse impact on a child and their ability to perform well at school and to complete their schooling<sup>9,12</sup>. Previous research has not always considered objective measures of school performance, instead relying on subjective reports from parents or teachers<sup>12,13</sup>. This research has lacked information regarding a child's ongoing healthcare use<sup>12</sup>, lacked an indication of the severity of the child's injury or illness<sup>9</sup>, often involved small sample sizes<sup>14</sup>, and has not been able to examine the impact on school performance over a range of ages or over time for the same child<sup>14</sup>. This study aims to examine education performance, school completion and health outcomes of children who have been hospitalised with an injury or a chronic health condition compared to children who have not been hospitalised for these conditions.

## ***Study objective and aims***

The overall objective is to examine education performance, school completion and health outcomes of children who have been hospitalised with an injury or a chronic health

1  
2  
3 condition (i.e. diabetes, epilepsy, asthma, or a mental health condition). The specific aims  
4 are to:

- 5  
6  
7 (1) compare school performance among injured or chronically ill children and a matched  
8 comparison group;  
9  
10 (2) examine factors influencing school performance of injured or chronically ill children  
11 compared to a matched comparison group, such as sociodemographic (e.g. age,  
12 gender, socioeconomic), parental (e.g. education), and clinical factors;  
13  
14 (3) determine factors that either positively or negatively mediate young people  
15 completing high school (year 10, 11 or 12); and  
16  
17 (4) assess characteristics of long-term health service utilization and hospital treatment  
18 cost among injury or chronically ill children compared to a matched comparison  
19 group.  
20  
21  
22  
23  
24  
25

## 26 27 **Method and analysis**

### 28 ***Study design***

29  
30 This will be a retrospective population-level case-comparison study of injured or chronically  
31 ill children (i.e. diabetes, epilepsy, asthma, or mental health conditions). These five  
32 conditions were selected as injuries are the leading cause of hospitalisation in Australia for  
33 children aged 1-18 years <sup>15</sup> and the 4 chronic health conditions represent the most common  
34 health conditions experienced by children in Australia <sup>16</sup> that have previously been  
35 associated with having a detrimental impact on learning <sup>1-8</sup>. This will be a retrospective  
36 epidemiological study of children aged ≤18 years at the date of admission for their index  
37 hospitalisation in New South Wales (NSW), Australia. It will include matched population-  
38 level comparison groups for each health condition.  
39  
40  
41  
42  
43  
44  
45  
46  
47  
48

### 49 ***Data sources***

50  
51 Nine administrative data collections in NSW will be linked and analysed for this study:  
52 hospital admissions, emergency department (ED) presentations, ambulatory mental health  
53 client contacts, the Registry of Births, Deaths and Marriages (RBDM) and the Cause of Death  
54 Unit Record File (COD-URF) mortality data collections, the National Assessment Plan for  
55 Literacy and Numeracy (NAPLAN), school enrolments, high school completions (year 10, 11  
56 or 12), and RBDM birth data.  
57  
58  
59  
60

1  
2  
3 **Information on hospital service use:** will be obtained from ED presentation and hospital  
4 admission data collections. Hospitalisation data includes information on admissions to  
5 public and private hospitals and records of patient demographics, source of referral,  
6 diagnoses, separation type, acute/non-acute care, Australian Refined Diagnosis Related  
7 Groups (AR-DRGs), and clinical procedures. Data collected on ED presentations in public  
8 hospitals also include arrival and departure times, triage category, type of visit, provisional  
9 diagnosis, and clinical procedures.  
10  
11  
12  
13  
14  
15  
16  
17

18 **Ambulatory mental health client contacts:** includes information regarding the care  
19 individuals received from ambulatory specialist mental health services at public hospitals.  
20 This includes mental health day programs, psychiatric outpatients and outreach services,  
21 including home visits. It contains information on care provided by hospital-based  
22 consultation liaison services to admitted patients in non-psychiatric and hospital emergency  
23 settings, care provided by community workers to admitted patients and clients in staffed  
24 community residential settings, and mental health promotion and prevention services.  
25  
26  
27  
28  
29  
30  
31

32 **Scholastic performance:** the NAPLAN assessments are conducted on all Australian children  
33 in primary school years 3 (7-9 years of age) and 5 (9-11 years of age), and secondary school  
34 years 7 (11-13 years of age) and 9 (13-15 years of age), and includes assessments in five  
35 domains: reading, spelling, writing, grammar, punctuation and numeracy. Each domain is  
36 scored out of 1000 and translated into bands that indicate whether the child performed  
37 above or below the national minimum standard (NMS). Inability to achieve the NMS  
38 indicates that a child will have difficulty making progress in school without assistance<sup>17</sup>. A  
39 child's attendance or absence from NAPLAN assessments will also be obtained.  
40  
41  
42  
43  
44  
45  
46  
47  
48

49 **Parent demographics:** parents' occupation and highest level of education will be obtained.  
50  
51

52 **School enrolments and school completion:** information on school enrolment and school  
53 changes will be obtained; high school retention to years 10, 11 and 12 will be obtained  
54 through records of high school completion awards known as the Record of School  
55 Achievement, and the Higher School Certificate.  
56  
57  
58  
59  
60



1  
2  
3 **Survival:** Mortality data from the RBDM mortality data will provide information on fact of  
4 death and information from the COD-URF will provide information on the cause of death.  
5  
6  
7

8 **Births:** RBDM birth data will provide a NSW population-level sample to identify the  
9 comparison cohorts for the injured or chronically ill children.  
10  
11  
12

### 13 **Case inclusion criteria**

14  
15 A principal diagnosis of injury (International Classification of Diseases, 10<sup>th</sup> Revision,  
16 Australian Modification (ICD-10-AM): S00-T79) in hospitalisation data during an 18 year  
17 timeframe (i.e. 1 January 2001 to 31 December 2018) and aged  $\leq 18$  years at the date of  
18 admission. A principal or any diagnosis (up to 50 diagnoses) of diabetes (ICD-10-AM: E09-  
19 E14), epilepsy (ICD-10-AM: G40, G41), asthma (ICD-10-AM: J45), or a mental health  
20 condition (ICD-10-AM: F10-F99). Different types of mental health conditions have not been  
21 individually selected as children with one mental health condition can experience multiple  
22 conditions e.g. mood effective disorders (ICD-10-AM: F30-F39) and neurotic disorders (ICD-  
23 10-AM: F40-F49), which would result in duplicate case identification<sup>18</sup>. Mental health  
24 condition data will be analysed on receipt of this information and condition groups detailed.  
25 Some children may have multiple health conditions recorded and these cases will be  
26 reviewed on receipt of the hospitalisation data and will likely be treated as a 'multiple  
27 health condition' group.  
28  
29  
30  
31  
32  
33  
34  
35  
36  
37  
38  
39  
40  
41

### 42 **Population-comparison group criteria**

43 The population comparison group will consist of children aged  $\leq 18$  years who were born in  
44 NSW, who had not previously had a hospital admission with a principal diagnosis of injury or  
45 a principal or any diagnosis of diabetes, epilepsy, asthma, or a mental health condition, and  
46 who were alive at the date of admission of their matched case. The comparison group will  
47 be randomly matched in a 1:4 ratio on age, gender and residential postcode to their  
48 matched case.  
49  
50  
51  
52  
53  
54  
55

### 56 **Sample size calculation**

57 There will be an estimated 22,300 injury<sup>10</sup> and 16,647 chronic disease<sup>19-21</sup> hospitalisations of  
58 children aged  $\leq 18$  years each year. To detect a relative risk of 1.5, with 5% significance and  
59  
60

1  
2  
3 80% power, a minimum sample size of 200 cases will be required with 800 in each  
4 comparison group. It is possible that there will be a number of children absent from school  
5 for NAPLAN assessments, but this large cohort the study will retain sufficient power for  
6 analysis.  
7  
8  
9

### 10 11 12 **Record linkage**

13  
14 The data linkage component of the study will be conducted by a third party agency, the  
15 Centre for Health Record Linkage (CHeReL). To link the data extracts, the CHeReL retains  
16 only the identifying information (e.g. first name, last name, date of birth) from each data  
17 extract. Linkage is conducted using probabilistic record linkage which is based on computing  
18 the probability that two records belong to the same person. The linkage process creates a  
19 project specific linkage key. The project specific key is returned to the CHeReL Data  
20 Integration Unit (or the data custodian) along with their original source record identifier.  
21 The CHeReL Data Integration Unit (or the data custodian) extracts the approved content  
22 variables (excluding identifying information such as names), attaches the project specific  
23 linkage key and securely transfers the data extract to the study investigators. The study  
24 investigators will then re-link the data extracts using the project specific linkage key and  
25 date-based and other content variables.  
26  
27  
28  
29  
30  
31  
32  
33  
34  
35  
36  
37

### 38 **Classification frameworks**

39  
40 **Geographical identification:** The Australian Statistical Geographical Standard (ASGS) will be  
41 used to identify children living in rural and urban NSW. Residents are assigned to one of five  
42 geographical categories using index scores of distance to service centres<sup>22</sup>. For ease of  
43 analysis and reporting, the five categories will be collapsed into: urban (i.e. major cities) and  
44 rural (i.e. inner and outer regional, remote, and very remote)<sup>23</sup>.  
45  
46  
47  
48  
49  
50

51 **Socioeconomic status identification:** A measure of socioeconomic status will be assigned to  
52 each case or comparison using their postcode of residence and the Index of Relative  
53 Socioeconomic Disadvantage<sup>24</sup>. Socioeconomic disadvantage will be partitioned into  
54 quintiles from most (i.e. 1) to least disadvantaged (i.e. 5).  
55  
56  
57  
58  
59  
60

1  
2  
3  
4 **Injury or condition severity:** For injured children, injury severity will be estimated using the  
5 International Classification of Injury Severity Score <sup>25</sup>. The injury severity score is derived for  
6 each injured child by multiplying the probability of survival for each injury diagnosis using  
7 survival risk ratios (SRR). Injury severity will be estimated using previously developed SRRs  
8  
9 <sup>26</sup> and will be categorised as minor ( $\geq 0.99$ ), moderate ( $>0.941$ - $<0.99$ ) or serious ( $\leq 0.941$ ) <sup>27</sup>.  
10 Proxy indicators of severity of the chronic health conditions will be considered, including  
11 number of ED presentations or hospital admissions, and hospital length of stay <sup>28</sup>.  
12  
13  
14  
15  
16  
17

### 18 **Outcomes**

19 The primary outcome measures will be school performance on each of the five NAPLAN  
20 domains (i.e. reading, spelling, writing, grammar and punctuation, and numeracy) above or  
21 below the NMS, and school completion at year 10, 11 or 12. Secondary outcomes will  
22 include hospital length of stay, hospital treatment costs, number of hospital admissions,  
23 number of ED presentations, number of mental health client contacts, where relevant  
24 (Table 1).  
25  
26  
27  
28  
29  
30  
31

### 32 **Data analysis plan**

33 All hospital episodes of care related to the one event will be linked to form a period of  
34 health care. Child injury and each chronic illness will be examined separately. To compare  
35 school performance for injured or chronically ill children to their comparison groups,  
36 generalized linear regression will assess the difference in proportions of performances  
37 below the NMS for each of five NAPLAN domains for the school grades 3, 5, 7 and 9. To  
38 identify factors influencing school performance of injured or chronically ill children, factors  
39 related to performance below NMS such as sociodemographic (e.g. age, gender,  
40 socioeconomic), parental (e.g. education), and clinical (e.g. number of ED presentations,  
41 hospital admissions, hospital length of stay) factors (Table 2) will be examined using  
42 multivariate logistic regression. Relative risks, odds ratios and 95% confidence intervals (CIs)  
43 will be calculated. It is likely that sensitivity analyses for potential missing values will need to  
44 be conducted for some data variables. In addition, group-based trajectory modelling <sup>29</sup> will  
45 be undertaken to identify clusters of children with similar school performance outcomes  
46 over time. Information such as sociodemographic (i.e. age, gender, socioeconomic status),  
47  
48  
49  
50  
51  
52  
53  
54  
55  
56  
57  
58  
59  
60

1  
2  
3 clinical and parental education will be used to estimate a child's probability of group  
4 membership over time.  
5  
6  
7

8  
9 To identify factors influencing high school completion at either year 10, 11 or 12 for injured  
10 or chronically ill children compared to the comparison group, factors related to poor school  
11 completions, including sociodemographic (e.g. age, gender, socioeconomic), parental (e.g.  
12 education), and clinical (e.g. ED presentations, hospital admissions) factors will be examined  
13 using multivariate logistic regression. Relative risks, odds ratios and 95% CIs will be  
14 calculated.  
15  
16  
17  
18

19  
20  
21 The characteristics of long-term health service utilisation and hospital treatment cost among  
22 injured or chronically ill children compared to their comparison group will be assessed using  
23 a generalised linear model with a log link and gamma error distribution to assess hospital  
24 length of stay, hospital treatment costs, and the number of hospital admissions during the  
25 study period. These will be adjusted for sociodemographic and other characteristics, such as  
26 injury severity, as relevant.  
27  
28  
29  
30  
31

### 32 33 34 **Ethics and dissemination plan**

35  
36 Ethical approval was obtained from the NSW Population Health Services Research Ethics  
37 Committee (HREA: 018HRE0904). Dissemination of research results will be conducted  
38 through peer-review journal articles and presentations at relevant professional conferences.  
39 Research findings will also be provided to government agencies, including health and  
40 education authorities.  
41  
42  
43  
44  
45

### 46 47 **Patient and public involvement**

48  
49 There was no patient involvement in the design of the record linkage study.  
50  
51

### 52 53 **Limitations**

54  
55 There will be some study limitations to take into consideration in the interpretation of  
56 findings. Only health conditions that are relevant to a hospital admission are indicated in  
57 hospital diagnosis records, so it is possible that some conditions could be under-  
58 enumerated. The study would identify cases where the child had been hospitalised for the  
59  
60

1  
2  
3 injury or chronic health condition, so would not identify children presenting solely to other  
4 medical professionals, such as general practitioners, for treatment. However, children who  
5 are hospitalised for their injury or health condition are likely to be the most seriously  
6 affected. There will not be an opportunity to examining the validity of diagnoses (except  
7 between administrative health records) and it is possible that there could be some  
8 misclassification. The NSW ED presentation data does not contain information on ED  
9 presentations to private hospitals, so private hospital ED presentations will not be  
10 examined. However, almost all (93%) of ED services are provided by public hospitals in  
11 Australia<sup>30</sup>. In identifying the matched comparison cohorts, the recency of postcode of  
12 usual residence may vary between data collections. For example, postcode of residence at  
13 birth could vary from postcode of residence while at school.

## 24 25 Discussion

26  
27 This research will examine the impact on school performance and high school completion of  
28 children who are hospitalised for an injury or a chronic health condition – namely diabetes,  
29 epilepsy, asthma or mental health conditions – compared to children who have not been  
30 seriously affected and hospitalised for these health conditions. It will identify the  
31 characteristics of children who are most likely to be adversely affected by their health  
32 conditions. This may include children who have multiple hospital admissions, extended time  
33 in hospital, more serious injuries, multiple health conditions, specific types of injuries or  
34 children whose primary language is not English or who reside in disadvantaged  
35 socioeconomic areas. The study is also likely to include children whose injuries and illnesses  
36 are the direct cause of cognitive difficulties resulting in poor educational performance. It is  
37 anticipated that research findings will identify any educational outcome disparities with a  
38 comparison population and the characteristics of injured and chronically ill children most  
39 likely to have problems with learning at school and will highlight where educational support  
40 services are most needed.  
41  
42  
43  
44  
45  
46  
47  
48  
49  
50  
51  
52  
53  
54  
55  
56  
57  
58  
59  
60

1  
2  
3 **Contributors:** RM prepared the first draft of the study protocol. All authors commented on  
4 the draft manuscript and approved the final version of the manuscript.  
5  
6  
7

8 **Funding:** Philanthropic donor.  
9  
10

11 **Competing interests:** None declared.  
12  
13

14 **Patient consent for publication:** Not required.  
15  
16

17 **Ethics approval:** NSW Population Health Services Research Ethics Committee (HREA:  
18 018HRE0904).  
19  
20  
21  
22  
23  
24

25 **Provenance and peer-review:** Not commissioned; an external peer-reviewed was  
26 conducted as part of the ethics application to the NSW Population Health Services Research  
27 Ethics Committee.  
28  
29  
30  
31  
32  
33  
34  
35  
36  
37  
38  
39  
40  
41  
42  
43  
44  
45  
46  
47  
48  
49  
50  
51  
52  
53  
54  
55  
56  
57  
58  
59  
60

## References

1. Dahlquist G, Källén B, Swedish Childhood Diabetes Study Group. School performance in children with type 1 diabetes—a population-based register study. *Diabetologia* 2007;50(5):957-64.
2. Jones C, DeWalt D, Huang I. Impaired patient-reported outcomes predict poor school functioning and daytime sleepiness: the PROMIS pediatric asthma study. *Academic Pediatrics* 2017;17(8):850-54.
3. Miziara C, de Manreza M, Mansur L, et al. Impact of benign childhood epilepsy with centrotemporal spikes (BECTS) on school performance. *Seizure* 2012;21(2):87-91.
4. Prasad M, Swank P, Ewing-Cobbs L. Long-term school outcomes of children and adolescents with traumatic brain injury. *The Journal of Head Trauma Rehabilitation* 2017;32(1):E24.
5. Wood J. Effect of anxiety reduction on children's school performance and social adjustment. *Dev Psychol* 2006;42(2):345-49.
6. Faraone S, Biederman J, Lehman B, et al. Intellectual performance and school failure in children with attention deficit hyperactivity disorder and in their siblings. *J Abnorm Psychol* 1993;102(4):616-23.
7. Hoffmann I, Diefenbach C, Gräf C, et al. Chronic health conditions and school performance in first graders: A prospective cohort study. *PloS One* 2018;13(3):e0194846.
8. Azzam N, Oei J, Adams S, et al. Influence of early childhood burns on school performance: an Australian population study. *Archives of Disease in Childhood* 2018;103:444-51.
9. Maslow G, Haydon A, McRee A, et al. Growing up with a chronic illness: social success, educational/vocational distress. *J Adolesc Health* 2011;49(2):206-12.
10. Mitchell R, Curtis K, Forster K. A 10-year review of child injury hospitalisations, health outcomes and treatment costs in Australia. *Injury Prevention* 2018;24:344-05.
11. Foster K, Young A, Mitchell R, et al. Experiences and needs of parents of critically injured children during the acute hospital phase: a qualitative investigation. *Injury* 2017;48(1):114-20.
12. Hoffmann I, Diefenbach C, Gräf C, et al. Chronic health conditions and school performance in first graders: A prospective cohort study. *PloS one* 2018;13(3):e0194846.
13. Hawley C. Behaviour and school performance after brain injury. *Brain Inj* 2004;18(7):645-59.
14. Crump C, Rivera D, London R, et al. Chronic health conditions and school performance among children and youth. *Ann Epidemiol* 2013;23(4):179-84.
15. Australian Institute of Health and Welfare. Australia's Health 2018. Canberra: AIHW, 2018.
16. Australian Institute of Health and Welfare. A picture of Australia's children 2012. Canberra: AIHW, 2012.
17. ACARA. National Assessment Program: Literacy and Numeracy. Sydney: ACARA, 2017.
18. Mitchell R, Curtis K, Braithwaite J. Health outcomes and costs for injured young people hospitalised with and without chronic health conditions. *Injury* 2017.
19. Mitchell R, Herkes G, Nikpour A, et al. Examining health service utilization, hospital treatment cost, and mortality of individuals with epilepsy and status epilepticus in New South Wales, Australia 2012–2016. *Epilepsy & Behavior* 2018;79:9-16.

- 1
  - 2
  - 3
  - 4
  - 5
  - 6
  - 7
  - 8
  - 9
  - 10
  - 11
  - 12
  - 13
  - 14
  - 15
  - 16
  - 17
  - 18
  - 19
  - 20
  - 21
  - 22
  - 23
  - 24
  - 25
  - 26
  - 27
  - 28
  - 29
  - 30
  - 31
  - 32
  - 33
  - 34
  - 35
  - 36
  - 37
  - 38
  - 39
  - 40
  - 41
  - 42
  - 43
  - 44
  - 45
  - 46
  - 47
  - 48
  - 49
  - 50
  - 51
  - 52
  - 53
  - 54
  - 55
  - 56
  - 57
  - 58
  - 59
  - 60
20. Australian Institute of Health and Welfare. National Hospital Morbidity Database datacubes. Secondary National Hospital Morbidity Database datacubes 2018. [www.aihw.gov.au](http://www.aihw.gov.au).
21. NSW Ministry of Health. HealthStats NSW. Secondary HealthStats NSW 2018. <http://www.healthstats.nsw.gov.au/>.
22. Australian Bureau of Statistics. 1270.0.55.005 - Australian Statistical Geography Standard (ASGS): Volume 5 - Remoteness Structure, July 2011. Secondary 1270.0.55.005 - Australian Statistical Geography Standard (ASGS): Volume 5 - Remoteness Structure, July 2011 23/07/2014 2013. <http://www.abs.gov.au/AUSSTATS/abs@.nsf/DetailsPage/1270.0.55.005July%202011?OpenDocument>.
23. Lower T, Mitchell R. Farm injury hospitalisations in New South Wales (2010 to 2014). *Aust N Z J Public Health* 2017;41(4):388-93.
24. Australian Bureau of Statistics. Census of Population and Housing: Socio-Economic Indexes for Areas (SEIFA), Australia. Catalogue no: 2033.0.55.001. Canberra: Australian Bureau of Statistics, 2011.
25. Osler T, Rutledge R, Deis J, et al. ICISS: An International Classification of Disease-9 based injury severity score. *Journal of Trauma Injury Infection and Critical Care* 1996;41(3):380-88.
26. Stephenson S, Henley G, Harrison J, et al. Diagnosis-based Injury Severity Scaling. Adelaide: AIHW, 2003.
27. Dayal S, Wren J, Wright C. Mapping injury severity scores against hospitalisation day stays for injury priority areas (excluding workplace injury). Wellington: Public Health Intelligence, Health and Disability Systems Strategy Directorate, Ministry of Health, 2008.
28. Maslow G, Haydon A, Ford C, et al. Young adult outcomes of children growing up with a chronic illness. *Arch Pediatr Adolesc Med* 2011;165(3):256-61.
29. Nagan D. *Group-based modeling of development*. Massachusetts: Harvard University Press, 2005.
30. Australian Institute of Health and Welfare. Australia's hospitals 2014–15 at a glance. Canberra: Australian Institute of Health and Welfare, 2016.



**Table 1: School performance, school completion and health service use outcome measures**

| Outcome                                  | Data source                                                    | Outcome measure                                      |
|------------------------------------------|----------------------------------------------------------------|------------------------------------------------------|
| <b>School performance and completion</b> |                                                                |                                                      |
| NAPLAN – reading                         | NAPLAN                                                         | Number of children above/below NMS                   |
| NAPLAN – spelling                        | NAPLAN                                                         | Number of children above/below NMS                   |
| NAPLAN - writing                         | NAPLAN                                                         | Number of children above/below NMS                   |
| NAPLAN – grammar and punctuation         | NAPLAN                                                         | Number of children above/below NMS                   |
| NAPLAN - numeracy                        | NAPLAN                                                         | Number of children above/below NMS                   |
| School completion – year 10              | Record of School Achievement and the Higher School Certificate | Number of children not completing/completing year 10 |
| School completion – year 11              | Record of School Achievement and the Higher School Certificate | Number of children not completing/completing year 11 |
| School completion – year 12              | Record of School Achievement and the Higher School Certificate | Number of children not completing/completing year 12 |
| <b>Health service use</b>                |                                                                |                                                      |
| ED presentations                         | ED presentation data                                           | Number of ED presentations                           |
| Hospital admissions                      | Hospital admissions data                                       | Number of hospitalisations                           |
| Hospital length of stay                  | Hospital admissions data                                       | Total hospital length of stay                        |
| Hospital treatment cost                  | Hospital admissions data                                       | Total hospital treatment cost                        |
| Mental health client contacts            | Ambulatory mental health client data                           | Number of mental health client contacts              |

NAPLAN: National Assessment Plan for Literacy and Numeracy. NMS: National minimum standard. ED: Emergency Department.

**Table 2: Potential mediating and explanatory data variables**

| Type                                            | Data variable                                                                                                                                  |
|-------------------------------------------------|------------------------------------------------------------------------------------------------------------------------------------------------|
| <b>School performance and completion</b>        |                                                                                                                                                |
| <b>Child</b>                                    | Age                                                                                                                                            |
|                                                 | Sex                                                                                                                                            |
|                                                 | Socioeconomic status                                                                                                                           |
|                                                 | Geographic location                                                                                                                            |
| <b>Children with an injury</b>                  | Injury severity                                                                                                                                |
| <b>Children with a chronic health condition</b> | Proxy indicators of severity will be considered, including number of ED presentations or hospital admissions, or total hospital length of stay |
| <b>Parent</b>                                   | Highest level of education                                                                                                                     |
|                                                 | Occupation                                                                                                                                     |
| <b>Clinical</b>                                 | Number of ED presentations                                                                                                                     |
|                                                 | Number of hospitalisations                                                                                                                     |
|                                                 | Total hospital length of stay                                                                                                                  |

ED: Emergency Department.

# BMJ Paediatrics Open

## Impact of chronic health conditions and injury on school performance and health outcomes in New South Wales, Australia: a retrospective record linkage study protocol

|                               |                                                                                                                                                                                                                                                                                                                                                                                                                                                                                                                                                                                                                                                                                                                                                                                                                                 |
|-------------------------------|---------------------------------------------------------------------------------------------------------------------------------------------------------------------------------------------------------------------------------------------------------------------------------------------------------------------------------------------------------------------------------------------------------------------------------------------------------------------------------------------------------------------------------------------------------------------------------------------------------------------------------------------------------------------------------------------------------------------------------------------------------------------------------------------------------------------------------|
| Journal:                      | <i>BMJ Paediatrics Open</i>                                                                                                                                                                                                                                                                                                                                                                                                                                                                                                                                                                                                                                                                                                                                                                                                     |
| Manuscript ID                 | bmjpo-2019-000530.R1                                                                                                                                                                                                                                                                                                                                                                                                                                                                                                                                                                                                                                                                                                                                                                                                            |
| Article Type:                 | Protocol                                                                                                                                                                                                                                                                                                                                                                                                                                                                                                                                                                                                                                                                                                                                                                                                                        |
| Date Submitted by the Author: | 24-Jul-2019                                                                                                                                                                                                                                                                                                                                                                                                                                                                                                                                                                                                                                                                                                                                                                                                                     |
| Complete List of Authors:     | <p>Mitchell, Rebecca; Australian Institute of Health Innovation, Cameron, Cate; Royal Brisbane and Women's Hospital, Jamieson Trauma Institute; Queensland University of Technology, School of Public Health and Social Work</p> <p>Lystad, Reidar; Australian Institute of Health Innovation</p> <p>Nielssen, Olav; Macquarie University, Faculty of Medicine and Health Sciences</p> <p>McMaugh, Anne; Macquarie University, Department of Educational Studies, Faculty of Human Sciences</p> <p>Herkes, Geoffrey; The University of Sydney School of Medicine; Royal North Shore Hospital</p> <p>Schniering, Carolyn; Macquarie University, Department of Psychology</p> <p>Hng, Tien-Ming; Blacktown and Mount Druitt Hospital, Department of Diabetes and Endocrinology; Western Sydney University, School of Medicine</p> |
| Keywords:                     | Epidemiology, Outcomes research, Adolescent Health                                                                                                                                                                                                                                                                                                                                                                                                                                                                                                                                                                                                                                                                                                                                                                              |
|                               |                                                                                                                                                                                                                                                                                                                                                                                                                                                                                                                                                                                                                                                                                                                                                                                                                                 |

SCHOLARONE™  
Manuscripts

1  
2  
3  
4  
5  
6  
7  
8  
9  
10  
11  
12  
13  
14  
15  
16  
17  
18  
19  
20  
21  
22  
23  
24  
25  
26  
27  
28  
29  
30  
31  
32  
33  
34  
35  
36  
37  
38  
39  
40  
41  
42  
43  
44  
45  
46  
47  
48  
49  
50  
51  
52  
53  
54  
55  
56  
57  
58  
59  
60

**Impact of chronic health conditions and injury on school performance and health outcomes in New South Wales, Australia: a retrospective record linkage study protocol**

Rebecca J Mitchell<sup>1</sup>, Cate M Cameron<sup>2,3</sup>, Reidar P Lystad<sup>1</sup>, Olav Nielssen<sup>4</sup>, Anne McMaugh<sup>5</sup>, Geoffrey Herkes<sup>6,7</sup>, Carolyn Schniering<sup>8</sup>, Tien-Ming Hng<sup>9,10</sup>

<sup>1</sup>Australian Institute of Health Innovation, Faculty of Medicine and Health Sciences, Macquarie University, Sydney, Australia.

<sup>2</sup>Jamieson Trauma Institute, Royal Brisbane & Women's Hospital, Metro North Hospital and Health Services District, Brisbane, Australia.

<sup>3</sup>School of Public Health and Social Work, Queensland University of Technology, Brisbane, Australia.

<sup>4</sup> Faculty of Medicine and Health Sciences, Macquarie University, Sydney, Australia.

<sup>5</sup> Department of Educational Studies, Faculty of Human Sciences, Macquarie University, Sydney, Australia.

<sup>6</sup> University of Sydney, Sydney, Australia.

<sup>7</sup> Royal North Shore Hospital, Sydney, Australia.

<sup>8</sup> Department of Psychology, Macquarie University, Sydney, Australia.

<sup>9</sup> Department of Diabetes and Endocrinology, Blacktown-Mt Druitt Hospital, Sydney, Australia.

<sup>10</sup> School of Medicine, Western Sydney University, Sydney, Australia.

**Corresponding author:** Rebecca Mitchell (r.mitchell@mq.edu.au)

Australian Institute of Health Innovation, Macquarie University, Level 6, 75 Talavera Road, Macquarie University NSW 2109, Australia

Tel: +61 2 9850 2321 Fax: +61 2 9850 2499

1  
2  
3 **Impact of chronic health conditions and injury on school performance and health**  
4 **outcomes in New South Wales, Australia: a retrospective record linkage study protocol**  
5  
6  
7

8 **Abstract**  
9

10 **Introduction:** Children who have sustained a serious injury or who have a chronic health  
11 condition, such as diabetes or epilepsy, may have their school performance adversely  
12 impacted by the condition, treatment of the condition and/or time away from school.  
13 Examining the potential adverse impact requires the identification of children most likely to  
14 be affected and the use of objective measures of education performance. This may highlight  
15 educational disparities that could be addressed with learning support. This study aims to  
16 examine education performance, school completion and health outcomes of children in  
17 New South Wales, Australia who were hospitalised with an injury or a chronic health  
18 condition compared to children who have not been hospitalised for these conditions.  
19  
20  
21  
22  
23  
24  
25  
26

27 **Method and analysis:** This research will be a retrospective population-level case-  
28 comparison study of hospitalised injured or chronically ill children (i.e. diabetes, epilepsy,  
29 asthma, or mental health conditions) aged  $\leq 18$  years in New South Wales (NSW) Australia  
30 using linked health and education administrative data collections. It will examine the  
31 education performance, school completion and health outcomes of children who have been  
32 hospitalised in NSW with an injury or a chronic health condition compared to children  
33 randomly drawn from the NSW population (matched on gender, age and residential  
34 postcode) who have not been hospitalised for these conditions.  
35  
36  
37  
38  
39  
40

41 **Ethics and dissemination:** The study received ethics approval from the NSW Population  
42 Health Services Research Ethics Committee (2018HRE0904). Findings from the research will  
43 be published in peer-reviewed journals and presented at scientific conferences.  
44  
45  
46  
47  
48  
49  
50  
51  
52  
53  
54  
55  
56  
57  
58  
59  
60

**What is known on this subject**

- Poor health can have a negative impact on a child's ability to learn.
- Determining the impact of poor health on learning requires objective measures of education performance.
- There is limited information available regarding a child's ongoing healthcare use while they attend school.

**What this study adds**

- A population-level study to examine the impact of injury or chronic disease on children's scholastic performance.
- This study will identify the types of injuries and chronic illness associated with problems with learning at school.
- The developmental timing and need for educational support will be highlighted for chronically ill children accounting for age, gender and illness type.

## Introduction

Participation in school-based education is important for a child's mental, social and physical development. The World Health Organization's acknowledges the importance of quality primary and secondary education for all children in their global strategy for children's and adolescents' health <sup>1</sup>. Any restrictions on the ability of a child to perform to the best of their ability at school may adversely affect their career prospects and long-term quality of life. Traumatic injury or the presence of a chronic health condition, such as diabetes, epilepsy, asthma, or mental health conditions can have an adverse impact on the child's performance at school <sup>2-9</sup>. Interruptions to education can have a cumulative effect, resulting in being less likely to complete school or attend university and potentially limiting future employment opportunities <sup>10</sup>. Therefore, early identification and recognition of a child's need for learning support at school is critical.

Worldwide traumatic injury is a common cause of hospitalisation among children <sup>11</sup>. In Australia, injury is the leading cause of hospitalisation among children, with almost 70,000 children aged  $\leq 16$  years hospitalised each year <sup>12</sup>. Different types of injuries (e.g. burns, traumatic brain injury, orthopaedic injury) and the mechanism of injury (e.g. vehicle crash, pedal cycle collision, falls, self-harm) can affect children in different ways. The more serious the injury, often the more adverse impact on the child's psychological and physical health, and on the child's family <sup>13</sup>. Chronic health conditions are prevalent worldwide <sup>14</sup> and can also have an adverse impact on a child and their ability to perform well at school and to complete their schooling <sup>10 15</sup>. Previous research has not always considered objective measures of school performance, instead relying on subjective reports from parents or teachers <sup>15 16</sup>. This research has lacked information regarding a child's ongoing healthcare use <sup>15</sup>, lacked an indication of the severity of the child's injury or illness <sup>10</sup>, often involved small sample sizes <sup>17</sup>, and has not been able to examine the impact on school performance over a range of ages or over time for the same child <sup>17</sup>. This study aims to examine education performance, school completion and health outcomes of children who have been hospitalised with an injury or a chronic health condition compared to children who have not been hospitalised for these conditions.

### ***Study objective and aims***

The overall objective is to examine education performance, school completion and health outcomes of children who have been hospitalised with an injury or a chronic health condition (i.e. diabetes, epilepsy, asthma, or a mental health condition). The specific aims are to:

- (1) compare school performance among injured or chronically ill children and a matched comparison group;
- (2) examine factors influencing school performance of injured or chronically ill children compared to a matched comparison group, such as sociodemographic (e.g. age, gender, socioeconomic), parental (e.g. education), and clinical factors;
- (3) determine factors that either positively or negatively mediate young people completing high school (year 10, 11 or 12); and
- (4) assess characteristics of long-term health service utilization and hospital treatment cost among injury or chronically ill children compared to a matched comparison group.

### **Method and analysis**

#### ***Study design***

This will be a retrospective population-level case-comparison study of injured or chronically ill children (i.e. diabetes, epilepsy, asthma, or mental health conditions). These four health conditions and injury were selected as injuries are the leading cause of hospitalisation in Australia for children aged 1-18 years<sup>18</sup> and the four chronic health conditions represent the most common health conditions experienced by children in Australia<sup>19</sup> that have previously been associated with having a detrimental impact on learning<sup>2-9</sup>. This will be a retrospective epidemiological study of children aged  $\leq 18$  years at the date of admission for their index hospitalisation in New South Wales (NSW), Australia. It will include matched population-level comparison groups for each health condition.

#### ***Data sources***

Nine administrative data collections in NSW will be linked and analysed for this study: hospital admissions, emergency department (ED) presentations, ambulatory mental health client contacts, the Registry of Births, Deaths and Marriages (RBDM) and the Cause of Death



1  
2  
3 Unit Record File (COD-URF) mortality data collections, the National Assessment Plan for  
4 Literacy and Numeracy (NAPLAN), school enrolments, high school completions (year 10, 11  
5 or 12), and RBDM birth data.  
6  
7  
8  
9

10 **Information on hospital service use:** will be obtained from ED presentation and hospital  
11 admission data collections. Hospitalisation data includes information on admissions to  
12 public and private hospitals and records of patient demographics, source of referral,  
13 diagnoses, separation type, acute/non-acute care, Australian Refined Diagnosis Related  
14 Groups (AR-DRGs), and clinical procedures. Data collected on ED presentations in public  
15 hospitals also include arrival and departure times, triage category, type of visit, provisional  
16 diagnosis, and clinical procedures.  
17  
18  
19  
20  
21  
22  
23  
24

25 **Ambulatory mental health client contacts:** includes information regarding the care  
26 individuals received from ambulatory specialist mental health services at public hospitals.  
27 This includes mental health day programs, psychiatric outpatients and outreach services,  
28 including home visits. It contains information on care provided by hospital-based  
29 consultation liaison services to admitted patients in non-psychiatric and hospital emergency  
30 settings, care provided by community workers to admitted patients and clients in staffed  
31 community residential settings, and mental health promotion and prevention services.  
32  
33  
34  
35  
36  
37  
38  
39

40 **Scholastic performance:** the NAPLAN assessments are conducted on all Australian children  
41 in primary school years 3 (7-9 years of age) and 5 (9-11 years of age), and secondary school  
42 years 7 (11-13 years of age) and 9 (13-15 years of age), and includes assessments in five  
43 domains: reading, spelling, writing, grammar, punctuation and numeracy. Each domain is  
44 scored out of 1000 and translated into bands that indicate whether the child performed  
45 above or below the national minimum standard (NMS). Inability to achieve the NMS  
46 indicates that a child will have difficulty making progress in school without assistance<sup>20</sup>. A  
47 child's attendance or absence from NAPLAN assessments will also be obtained.  
48  
49  
50  
51  
52  
53  
54  
55

56 **Parent demographics:** parents' occupation and highest level of education will be obtained.  
57  
58  
59  
60

1  
2  
3 **School enrolments and school completion:** information on school enrolment and school  
4 changes will be obtained; high school retention to years 10, 11 and 12 will be obtained  
5 through records of high school completion awards known as the Record of School  
6 Achievement, and the Higher School Certificate.  
7  
8

9  
10 **Survival:** Mortality data from the RBDM mortality data will provide information on fact of  
11 death and information from the COD-URF will provide information on the cause of death.  
12  
13

14  
15  
16 **Births:** RBDM birth data will provide a NSW population-level sample to identify the  
17 comparison cohorts for the injured or chronically ill children.  
18  
19

### 20 21 **Case inclusion criteria**

22  
23 A principal diagnosis of injury (International Classification of Diseases, 10<sup>th</sup> Revision,  
24 Australian Modification (ICD-10-AM): S00-T79) in hospitalisation data during an 18 year  
25 timeframe (i.e. 1 January 2001 to 31 December 2018) and aged  $\leq 18$  years at the date of  
26 admission. A principal or any diagnosis (up to 50 diagnoses) of diabetes (ICD-10-AM: E09-  
27 E14), epilepsy (ICD-10-AM: G40, G41), asthma (ICD-10-AM: J45), or a mental health  
28 condition (ICD-10-AM: F10-F99). Different types of mental health conditions have not been  
29 individually selected as children with one mental health condition can experience multiple  
30 conditions e.g. mood effective disorders (ICD-10-AM: F30-F39) and neurotic disorders (ICD-  
31 10-AM: F40-F49), which would result in duplicate case identification<sup>21</sup>. Mental health  
32 condition data will be analysed on receipt of this information and condition groups detailed.  
33 Some children may have multiple health conditions recorded and these cases will be  
34 reviewed on receipt of the hospitalisation data and will likely be treated as a 'multiple  
35 health condition' group.  
36  
37  
38  
39  
40  
41  
42  
43  
44  
45  
46  
47  
48

### 49 **Population-comparison group criteria**

50  
51 The population comparison group will consist of children aged  $\leq 18$  years who were born in  
52 NSW, who had not previously had a hospital admission with a principal diagnosis of injury or  
53 a principal or any diagnosis of diabetes, epilepsy, asthma, or a mental health condition, and  
54 who were alive at the date of admission of their matched case. The comparison group will  
55 be randomly matched in a 1:4 ratio on age, gender and residential postcode to their  
56 matched case.  
57  
58  
59  
60

### **Sample size calculation**

There will be an estimated 22,300 injury<sup>12</sup> and 16,647 chronic disease<sup>22-24</sup> hospitalisations of children aged  $\leq 18$  years each year. To detect a relative risk of 1.5, with 5% significance and 80% power, a minimum sample size of 200 cases will be required with 800 in each comparison group. It is possible that there will be a number of children absent from school for NAPLAN assessments, but this large cohort the study will retain sufficient power for analysis.

### **Record linkage**

The data linkage component of the study will be conducted by a third party agency, the Centre for Health Record Linkage (CHeReL). To link the data extracts, the CHeReL retains only the identifying information (e.g. first name, last name, date of birth) from each data extract. Linkage is conducted using probabilistic record linkage which is based on computing the probability that two records belong to the same person. The linkage process creates a project specific linkage key. The project specific key is returned to the CHeReL Data Integration Unit (or the data custodian) along with their original source record identifier. The CHeReL Data Integration Unit (or the data custodian) extracts the approved content variables (excluding identifying information such as names), attaches the project specific linkage key and securely transfers the data extract to the study investigators. The study investigators will then re-link the data extracts using the project specific linkage key and date-based and other content variables.

### **Classification frameworks**

**Geographical identification:** The Australian Statistical Geographical Standard (ASGS) will be used to identify children living in rural and urban NSW. Residents are assigned to one of five geographical categories using index scores of distance to service centres<sup>25</sup>. For ease of analysis and reporting, the five categories will be collapsed into: urban (i.e. major cities) and rural (i.e. inner and outer regional, remote, and very remote)<sup>26</sup>.

**Socioeconomic status identification:** A measure of socioeconomic status will be assigned to each case or comparison using their postcode of residence and the Index of Relative

1  
2  
3 Socioeconomic Disadvantage <sup>27</sup>. Socioeconomic disadvantage will be partitioned into  
4 quintiles from most (i.e. 1) to least disadvantaged (i.e. 5).  
5  
6  
7

8  
9 ***Injury or condition severity:*** For injured children, injury severity will be estimated using the  
10 International Classification of Injury Severity Score <sup>28</sup>. The injury severity score is derived for  
11 each injured child by multiplying the probability of survival for each injury diagnosis using  
12 survival risk ratios (SRR). Injury severity will be estimated using previously developed SRRs  
13 <sup>29</sup> and will be categorised as minor ( $\geq 0.99$ ), moderate ( $>0.941$ - $<0.99$ ) or serious ( $\leq 0.941$ ) <sup>30</sup>.  
14 Proxy indicators of severity of the chronic health conditions will be considered, including  
15 number of ED presentations or hospital admissions, and hospital length of stay <sup>31</sup>.  
16  
17  
18  
19  
20  
21  
22

### 23 **Outcomes**

24 The primary outcome measures will be school performance on each of the five NAPLAN  
25 domains (i.e. reading, spelling, writing, grammar and punctuation, and numeracy) above or  
26 below the NMS, and school completion at year 10, 11 or 12. Secondary outcomes will  
27 include hospital length of stay, hospital treatment costs, number of hospital admissions,  
28 number of ED presentations, number of mental health client contacts, where relevant  
29 (Table 1).  
30  
31  
32  
33  
34  
35  
36  
37

### 38 **Data analysis plan**

39 Data analyses will be conducted using SAS 9.4. All hospital episodes of care related to the  
40 one event (e.g. all episodes of care related to the same injury event) will be linked to form a  
41 period of health care. Child injury and each chronic illness will be examined separately.  
42 Depending on sample size, some types of injuries may be examined separately, such as  
43 traumatic brain injury. For descriptive analyses, results with cell sizes  $<5$  will not be  
44 reported to prevent potential identification of individuals. To compare school performance  
45 for injured or chronically ill children to their comparison groups, generalized linear  
46 regression will assess the difference in proportions of performances below the NMS for each  
47 of five NAPLAN domains for the school grades 3, 5, 7 and 9. To identify factors influencing  
48 school performance of injured or chronically ill children, factors related to performance  
49 below NMS such as sociodemographic (e.g. age, gender, socioeconomic), parental (e.g.  
50 education), and clinical (e.g. number of ED presentations, hospital admissions, hospital  
51  
52  
53  
54  
55  
56  
57  
58  
59  
60

length of stay) factors (Table 2) will be examined using multivariate logistic regression. Relative risks, odds ratios and 95% confidence intervals (CIs) will be calculated. It is likely that sensitivity analyses for potential missing values will need to be conducted for some data variables. Potential missing values will be imputed using the discriminant function method with 100 imputations using PROC MI. Parameter estimates will be log-transformed and pooled results and 95% CIs will be generated using PROC MIANALYSE. Analyses will be performed with and without imputed data. In addition, group-based trajectory modelling<sup>32</sup> will be undertaken to identify clusters of children with similar school performance outcomes over time. Information such as sociodemographic (i.e. age, gender, socioeconomic status), clinical and parental education will be used to estimate a child's probability of group membership over time.

To identify factors influencing high school completion at either year 10, 11 or 12 for injured or chronically ill children compared to the comparison group, factors related to poor school completions, including sociodemographic (e.g. age, gender, socioeconomic), parental (e.g. education), and clinical (e.g. ED presentations, hospital admissions) factors will be examined using multivariate logistic regression. Relative risks, odds ratios and 95% CIs will be calculated.

The characteristics of long-term health service utilisation and hospital treatment cost among injured or chronically ill children compared to their comparison group will be assessed using a generalised linear model with a log link and gamma error distribution to assess hospital length of stay, hospital treatment costs, and the number of hospital admissions during the study period. These will be adjusted for sociodemographic and other characteristics, such as injury severity, as relevant.

### **Ethics and dissemination plan**

Ethical approval was obtained from the NSW Population Health Services Research Ethics Committee (HREA: 018HRE0904). Dissemination of research results will be conducted through peer-review journal articles and presentations at relevant professional conferences. Research findings will also be provided to government agencies, including health and education authorities.

## Patient and public involvement

There was no patient involvement in the design of the record linkage study.

## Limitations

There will be some study limitations to take into consideration in the interpretation of findings. Only health conditions that are relevant to a hospital admission are indicated in hospital diagnosis records, so it is possible that some conditions could be under-enumerated. The study would identify cases where the child had been hospitalised for the injury or chronic health condition, so would not identify children presenting solely to other medical professionals, such as general practitioners, for treatment. However, children who are hospitalised for their injury or health condition are likely to be the most seriously affected. There will not be an opportunity to examining the validity of diagnoses (except between administrative health records) and it is possible that there could be some misclassification. The NSW ED presentation data does not contain information on ED presentations to private hospitals, so private hospital ED presentations will not be examined. However, almost all (93%) of ED services are provided by public hospitals in Australia<sup>33</sup>. In identifying the matched comparison cohorts, the recency of postcode of usual residence may vary between data collections. For example, postcode of residence at birth could vary from postcode of residence while at school.

## Discussion

This research will examine the impact on school performance and high school completion of children who are hospitalised for an injury or a chronic health condition – namely diabetes, epilepsy, asthma or mental health conditions – compared to children who have not been seriously affected and hospitalised for these health conditions. It will identify the characteristics of children who are most likely to be adversely affected by their health conditions. This may include children who have multiple hospital admissions, extended time in hospital, more serious injuries, multiple health conditions, specific types of injuries or children whose primary language is not English or who reside in disadvantaged socioeconomic areas. The study is also likely to include children whose injuries and illnesses are the direct cause of cognitive difficulties resulting in poor educational performance. It is

1  
2  
3 anticipated that research findings will identify any educational outcome disparities with a  
4 comparison population and the characteristics of injured and chronically ill children most  
5 likely to have problems with learning at school and will highlight where educational support  
6 services are most needed.  
7  
8  
9

10  
11  
12  
13  
14  
15  
16  
17  
18  
19  
20  
21  
22  
23  
24  
25  
26  
27  
28  
29  
30  
31  
32  
33  
34  
35  
36  
37  
38  
39  
40  
41  
42  
43  
44  
45  
46  
47  
48  
49  
50  
51  
52  
53  
54  
55  
56  
57  
58  
59  
60

Confidential: For Review Only

1  
2  
3 **Contributors:** RM prepared the first draft of the study protocol. All authors commented on  
4 the draft manuscript and approved the final version of the manuscript.  
5  
6  
7

8 **Funding:** Philanthropic donor.  
9  
10

11 **Competing interests:** None declared.  
12  
13

14 **Patient consent for publication:** Not required.  
15  
16

17 **Ethics approval:** NSW Population Health Services Research Ethics Committee (HREA:  
18 018HRE0904).  
19  
20  
21  
22

23 **Provenance and peer-review:** Not commissioned; an external peer-reviewed was  
24 conducted as part of the ethics application to the NSW Population Health Services Research  
25 Ethics Committee.  
26  
27  
28  
29  
30  
31  
32  
33  
34  
35  
36  
37  
38  
39  
40  
41  
42  
43  
44  
45  
46  
47  
48  
49  
50  
51  
52  
53  
54  
55  
56  
57  
58  
59  
60



## References

1. World Health Organization. The global strategy for women's, children's and adolescents' health (2016-2030). Geneva: World Health Organization, 2015.
2. Dahlquist G, Källén B, Swedish Childhood Diabetes Study Group. School performance in children with type 1 diabetes—a population-based register study. *Diabetologia* 2007;50(5):957-64.
3. Jones C, DeWalt D, Huang I. Impaired patient-reported outcomes predict poor school functioning and daytime sleepiness: the PROMIS pediatric asthma study. *Academic Pediatrics* 2017;17(8):850-54.
4. Miziara C, de Manreza M, Mansur L, et al. Impact of benign childhood epilepsy with centrotemporal spikes (BECTS) on school performance. *Seizure* 2012;21(2):87-91.
5. Prasad M, Swank P, Ewing-Cobbs L. Long-term school outcomes of children and adolescents with traumatic brain injury. *The Journal of Head Trauma Rehabilitation* 2017;32(1):E24.
6. Wood J. Effect of anxiety reduction on children's school performance and social adjustment. *Dev Psychol* 2006;42(2):345-49.
7. Faraone S, Biederman J, Lehman B, et al. Intellectual performance and school failure in children with attention deficit hyperactivity disorder and in their siblings. *J Abnorm Psychol* 1993;102(4):616-23.
8. Hoffmann I, Diefenbach C, Gräf C, et al. Chronic health conditions and school performance in first graders: A prospective cohort study. *PloS One* 2018;13(3):e0194846.
9. Azzam N, Oei J, Adams S, et al. Influence of early childhood burns on school performance: an Australian population study. *Archives of Disease in Childhood* 2018;103:444-51.
10. Maslow G, Haydon A, McRee A, et al. Growing up with a chronic illness: social success, educational/vocational distress. *J Adolesc Health* 2011;49(2):206-12.
11. World Health Organization and UNICEF. World Report on Child Injury Prevention. Geneva: World Health Organization, 2008.
12. Mitchell R, Curtis K, Forster K. A 10-year review of child injury hospitalisations, health outcomes and treatment costs in Australia. *Injury Prevention* 2018;24:344-05. doi: 10.1136/injuryprev-2017-042451
13. Foster K, Young A, Mitchell R, et al. Experiences and needs of parents of critically injured children during the acute hospital phase: a qualitative investigation. *Injury* 2017;48(1):114-20.
14. World Health Organization. The World Health Report 2002 - Reducing Risks, Promoting Healthy Life. Geneva: World Health Organization, 2002.
15. Hoffmann I, Diefenbach C, Gräf C, et al. Chronic health conditions and school performance in first graders: A prospective cohort study. *PloS one* 2018;13(3):e0194846.
16. Hawley C. Behaviour and school performance after brain injury. *Brain Inj* 2004;18(7):645-59.
17. Crump C, Rivera D, London R, et al. Chronic health conditions and school performance among children and youth. *Ann Epidemiol* 2013;23(4):179-84.
18. Australian Institute of Health and Welfare. Australia's Health 2018. Canberra: AIHW, 2018.
19. Australian Institute of Health and Welfare. A picture of Australia's children 2012. Canberra: AIHW, 2012.

- 1
  - 2
  - 3
  - 4
  - 5
  - 6
  - 7
  - 8
  - 9
  - 10
  - 11
  - 12
  - 13
  - 14
  - 15
  - 16
  - 17
  - 18
  - 19
  - 20
  - 21
  - 22
  - 23
  - 24
  - 25
  - 26
  - 27
  - 28
  - 29
  - 30
  - 31
  - 32
  - 33
  - 34
  - 35
  - 36
  - 37
  - 38
  - 39
  - 40
  - 41
  - 42
  - 43
  - 44
  - 45
  - 46
  - 47
  - 48
  - 49
  - 50
  - 51
  - 52
  - 53
  - 54
  - 55
  - 56
  - 57
  - 58
  - 59
  - 60
20. ACARA. National Assessment Program: Literacy and Numeracy. Sydney: ACARA, 2017.
21. Mitchell R, Curtis K, Braithwaite J. Health outcomes and costs for injured young people hospitalised with and without chronic health conditions. *Injury* 2017 doi: <http://dx.doi.org/10.1016/j.injury.2017.06.002>
22. Mitchell R, Herkes G, Nikpour A, et al. Examining health service utilization, hospital treatment cost, and mortality of individuals with epilepsy and status epilepticus in New South Wales, Australia 2012–2016. *Epilepsy & Behavior* 2018;79:9-16.
23. Australian Institute of Health and Welfare. National Hospital Morbidity Database datacubes Canberra: AIHW; 2018 [Available from: [www.aihw.gov.au](http://www.aihw.gov.au) accessed 2/12/2018].
24. NSW Ministry of Health. HealthStats NSW North Sydney: NSW Ministry of Health; 2018 [Available from: <http://www.healthstats.nsw.gov.au/> accessed 2/12/2018 2018].
25. Australian Bureau of Statistics. 1270.0.55.005 - Australian Statistical Geography Standard (ASGS): Volume 5 - Remoteness Structure, July 2011 Canberra: Australian Bureau of Statistics; 2013 [updated 23/07/2014. Available from: <http://www.abs.gov.au/AUSSTATS/abs@.nsf/DetailsPage/1270.0.55.005July%202011?OpenDocument> accessed 03/09/2014 2014].
26. Lower T, Mitchell R. Farm injury hospitalisations in New South Wales (2010 to 2014). *Aust N Z J Public Health* 2017;41(4):388-93.
27. Australian Bureau of Statistics. Census of Population and Housing: Socio-Economic Indexes for Areas (SEIFA), Australia. Catalogue no: 2033.0.55.001. Canberra: Australian Bureau of Statistics, 2011.
28. Osler T, Rutledge R, Deis J, et al. ICISS: An International Classification of Disease-9 based injury severity score. *Journal of Trauma Injury Infection and Critical Care* 1996;41(3):380-88.
29. Stephenson S, Henley G, Harrison J, et al. Diagnosis-based Injury Severity Scaling. Adelaide: AIHW, 2003.
30. Dayal S, Wren J, Wright C. Mapping injury severity scores against hospitalisation day stays for injury priority areas (excluding workplace injury). Wellington: Public Health Intelligence, Health and Disability Systems Strategy Directorate, Ministry of Health, 2008.
31. Maslow G, Haydon A, Ford C, et al. Young adult outcomes of children growing up with a chronic illness. *Arch Pediatr Adolesc Med* 2011;165(3):256-61.
32. Nagan D. Group-based modeling of development. Massachusetts: Harvard University Press 2005.
33. Australian Institute of Health and Welfare. Australia's hospitals 2014–15 at a glance. Canberra: Australian Institute of Health and Welfare, 2016.

**Table 1: School performance, school completion and health service use outcome measures**

| Outcome                                  | Data source                                                    | Outcome measure                                      |
|------------------------------------------|----------------------------------------------------------------|------------------------------------------------------|
| <b>School performance and completion</b> |                                                                |                                                      |
| NAPLAN – reading                         | NAPLAN                                                         | Number of children above/below NMS                   |
| NAPLAN – spelling                        | NAPLAN                                                         | Number of children above/below NMS                   |
| NAPLAN - writing                         | NAPLAN                                                         | Number of children above/below NMS                   |
| NAPLAN – grammar and punctuation         | NAPLAN                                                         | Number of children above/below NMS                   |
| NAPLAN - numeracy                        | NAPLAN                                                         | Number of children above/below NMS                   |
| School completion – year 10              | Record of School Achievement and the Higher School Certificate | Number of children not completing/completing year 10 |
| School completion – year 11              | Record of School Achievement and the Higher School Certificate | Number of children not completing/completing year 11 |
| School completion – year 12              | Record of School Achievement and the Higher School Certificate | Number of children not completing/completing year 12 |
| <b>Health service use</b>                |                                                                |                                                      |
| ED presentations                         | ED presentation data                                           | Number of ED presentations                           |
| Hospital admissions                      | Hospital admissions data                                       | Number of hospitalisations                           |
| Hospital length of stay                  | Hospital admissions data                                       | Total hospital length of stay                        |
| Hospital treatment cost                  | Hospital admissions data                                       | Total hospital treatment cost                        |
| Mental health client contacts            | Ambulatory mental health client data                           | Number of mental health client contacts              |

NAPLAN: National Assessment Plan for Literacy and Numeracy. NMS: National minimum standard. ED: Emergency Department.

**Table 2: Potential mediating and explanatory data variables**

| Type                                            | Data variable                                                                                                                                  |
|-------------------------------------------------|------------------------------------------------------------------------------------------------------------------------------------------------|
| <b>School performance and completion</b>        |                                                                                                                                                |
| <b>Child</b>                                    | Age                                                                                                                                            |
|                                                 | Sex                                                                                                                                            |
|                                                 | Socioeconomic status                                                                                                                           |
|                                                 | Geographic location                                                                                                                            |
| <b>Children with an injury</b>                  | Injury severity                                                                                                                                |
| <b>Children with a chronic health condition</b> | Proxy indicators of severity will be considered, including number of ED presentations or hospital admissions, or total hospital length of stay |
| <b>Parent</b>                                   | Highest level of education                                                                                                                     |
|                                                 | Occupation                                                                                                                                     |
| <b>Clinical</b>                                 | Number of ED presentations                                                                                                                     |
|                                                 | Number of hospitalisations                                                                                                                     |
|                                                 | Total hospital length of stay                                                                                                                  |

ED: Emergency Department.
